# Supplementary material for: Hippocampal Estrogen Signaling Mediates Sex Differences in Retroactive Interference
Source: MDPI journal article supplement (doi:10.3390/biomedicines10061387), 2022-06-11
Supplement: s1 [file s1]

## Supplementary Materials

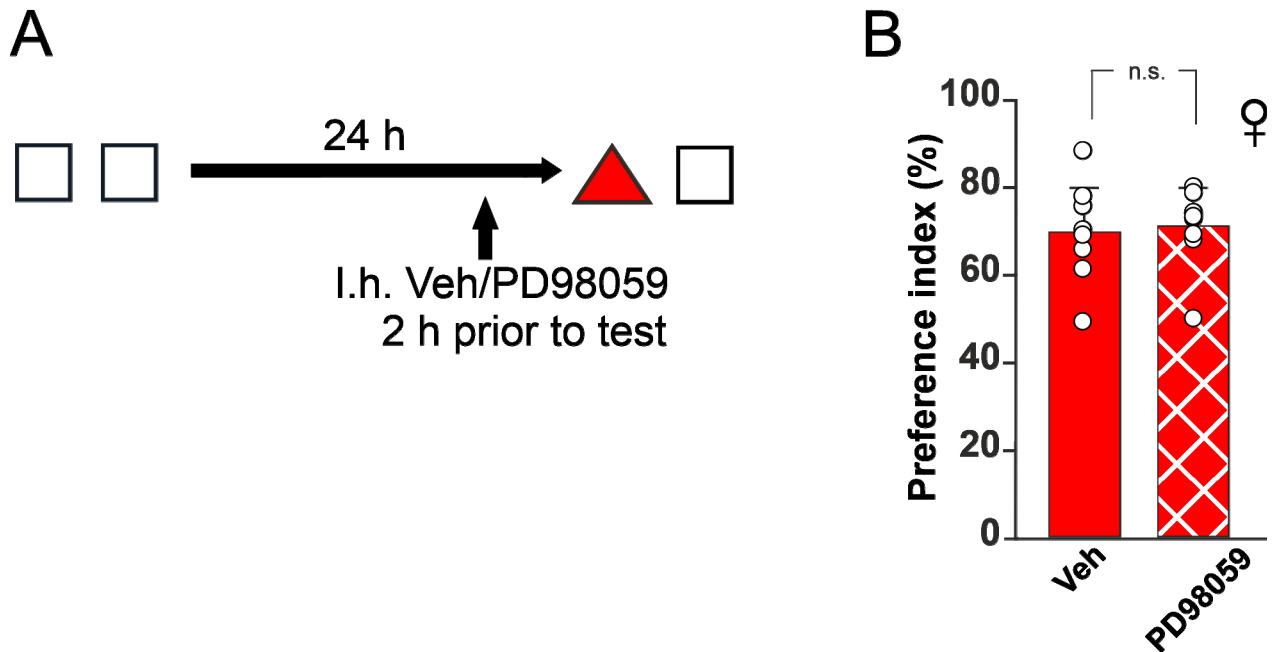

**Supplementary Figure S1.** ERK1/2 inactivation does not influence memory retrieval in a Std-NOR paradigm. A: Schematic representation of vehicle (Veh) or PD98059 intrahippocampal (I.h.) injection procedure; white squares represent object 1; red triangle represent object 2. B: Histograms (mean $\pm$ SD) showing preference indexes of female mice undergoing the Std-NOR paradigm in the presence of vehicle or PD98059. One way ANOVA,  $F_{(1,16)} = 0.094$ ;  $p = 0.763$ ; Veh  $n = 8$ ; PD98059  $n = 9$ . n.s. not significant. All graphs and images were realized using CorelDraw21 (Corel Corporation, Ottawa, Ontario, Canada).
